# Supplementary material for: Polyurethane-Encapsulated Biomass Films Based on MXene@Loofah Sponge for Piezoresistive Pressure Sensor Applications
Source: MDPI journal article supplement (doi:10.3390/polym16101377), 2024-05-12
Supplement: s1 [file s1]

# Support Information

## Polyurethane-Encapsulated Biomass Films Based on MXene@Loofah Sponges for Piezoresistive Pressure Sensor Applications

Qihan Jia, Shuai Liu and Haibo Wang \*

College of Biomass Science and Engineering, Sichuan University, Chengdu  
610065, China; jiaqihan@stu.scu.edu.cn (Q.J.);  
2021323080023@stu.scu.edu.cn (S.L.)

\* Correspondence: whb6985@scu.edu.cn; Tel.: +86-28-85401296

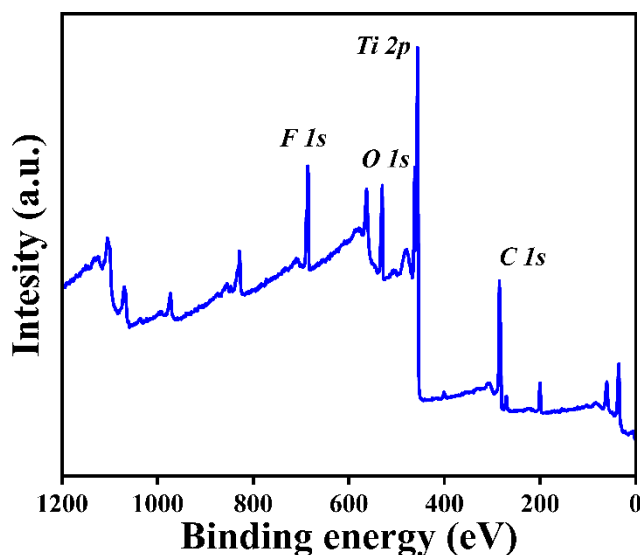

Figure S1. X-ray photoelectron spectroscopy (XPS) spectrum of MXene

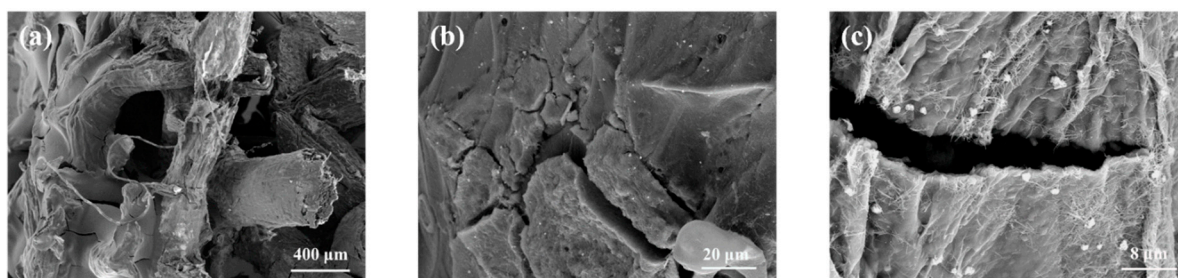

Figure S2. SEM images of PAM@Loofah (a) cross-section and (b,c) corresponding enlarged image.

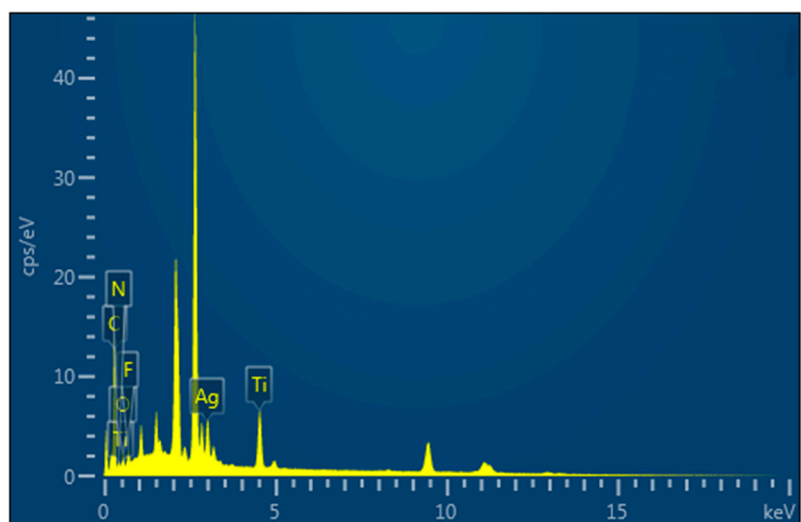

Figure S3. EDS image of the content of each element in PAM@loofah

Table S1. Content of each element in PAM@Loofah

| Elements | Wt%   | Atomic Percentage (%) |
|----------|-------|-----------------------|
| C        | 38.37 | 57.67                 |
| N        | 8.36  | 10.77                 |
| O        | 12.9  | 14.56                 |
| F        | 8.81  | 8.37                  |
| Ti       | 16    | 6.03                  |
| Ag       | 15.56 | 2.6                   |
